# Supplementary material
Source: PubMed Central journal article supplement (PMC6648728)
Supplement: ao9b00509_si_001.pdf [file ao9b00509_si_001.pdf]

# **Probing the Effect of Glucose on the Activity and Stability of a $\beta$ -glucosidase: An All Atom Molecular Dynamic Simulation Investigation**

**Sukanya Konar<sup>1</sup>, Sushant K. Sinha<sup>2</sup>, Supratim Datta<sup>2,3,4,\*</sup> and Pradip Kr. Ghorai<sup>1,\*</sup>**

*<sup>1</sup>Indian Institute of Science Education and Research Kolkata, Department of Chemical Sciences, Mohanpur 741246, India*

*<sup>2</sup>Protein Engineering Laboratory, Department of Biological Sciences, Indian Institute of Science Education and Research Kolkata, Mohanpur, India and <sup>3</sup>Centre for Advanced Functional Materials, Indian Institute of Science Education and Research Kolkata, Mohanpur, India and <sup>4</sup>Centre for Climate Change and Environmental Sciences, Indian Institute of Science Education and Research Kolkata, Mohanpur, India*

\*To whom correspondence may be addressed: [pradip@iiserkol.ac.in](mailto:pradip@iiserkol.ac.in) or [supratim@iiserkol.ac.in](mailto:supratim@iiserkol.ac.in)

Table S1: The glycone, aglycone and gate-keeper residues of the B8CYA8

| <b>Glycone binding site</b> | <b>Aglycone binding site</b> | <b>Gatekeeper residues</b> |
|-----------------------------|------------------------------|----------------------------|
| Q20                         | V169                         | W168                       |
| H121                        | N222                         | F172                       |
| W122                        | P225                         | E173                       |
| N165                        | Y296                         | F177                       |
| N294                        | S297                         | N179                       |
| W401                        | W327                         | H180                       |
| N406                        |                              | L223                       |
| E408                        |                              | T224                       |
| W409                        |                              | L242                       |
| K415                        |                              | I246                       |
| F417                        |                              | Y295                       |
|                             |                              | M299                       |
|                             |                              | V314                       |
|                             |                              | K316                       |
|                             |                              | E324                       |
|                             |                              | M325                       |
|                             |                              | P326                       |
|                             |                              | A410                       |
|                             |                              | Y411                       |

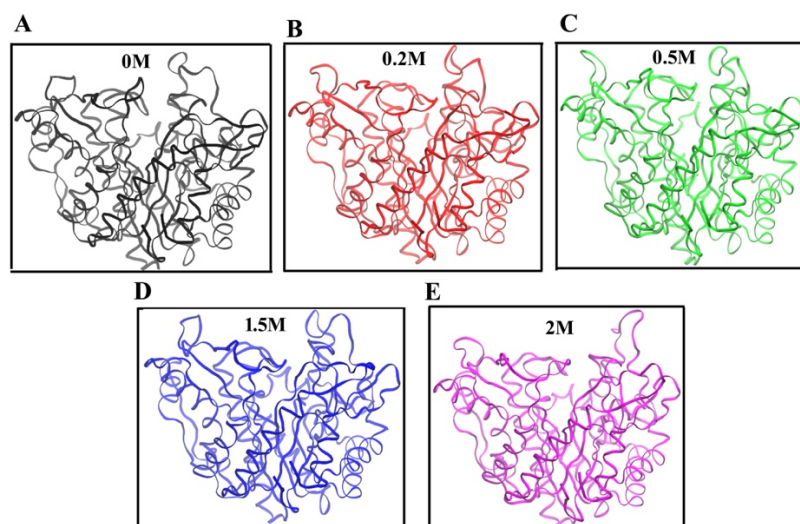

Figure S1: (A - E) are the last B8CYA8 structures for different glucose concentration at 335 K

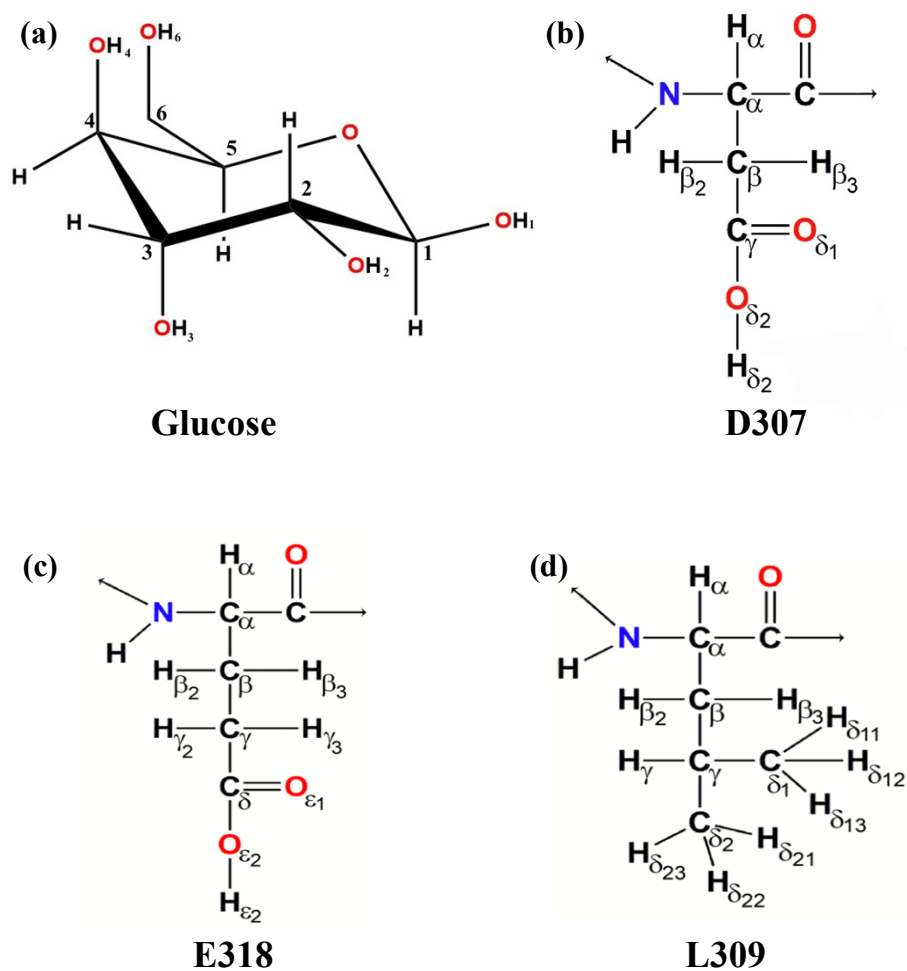

Figure S2: Atom notation for (a) Glucose, (b) D307, (c) E318 and (d) L309 amino acids

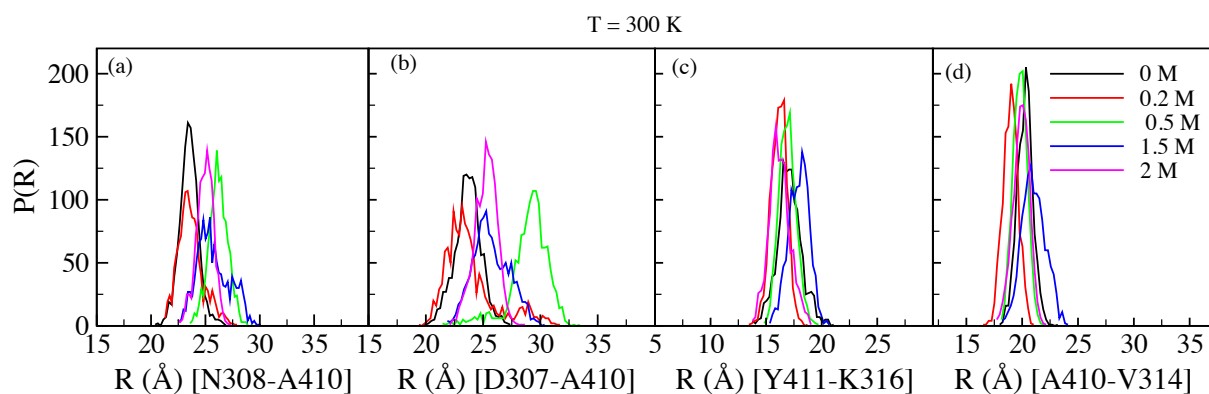

Figure S3: (a), (b), (c) and (d) show distance distribution  $[P(R)]$  for chosen pair of amino acids at 300 K

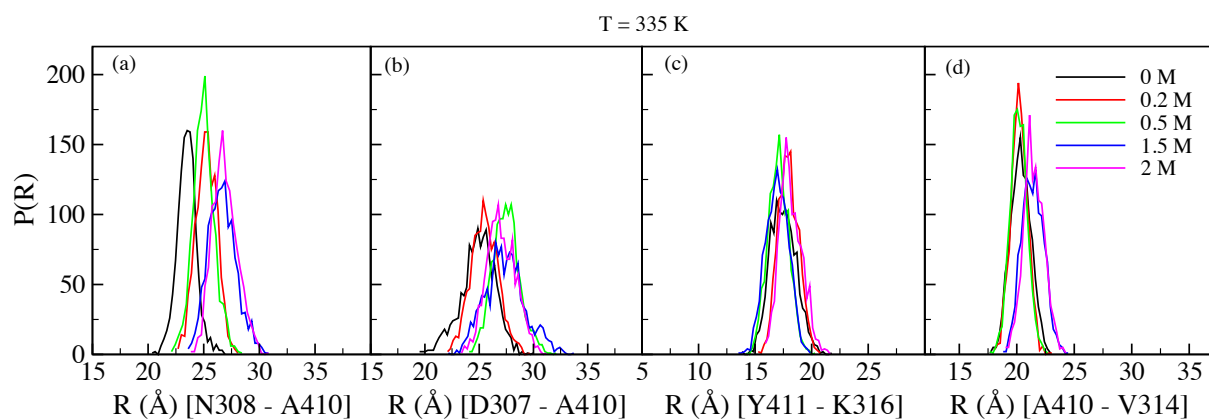

Figure S4: (a), (b), (c) and (d) show distance distribution  $[P(R)]$  for chosen pair of amino acids at 335 K

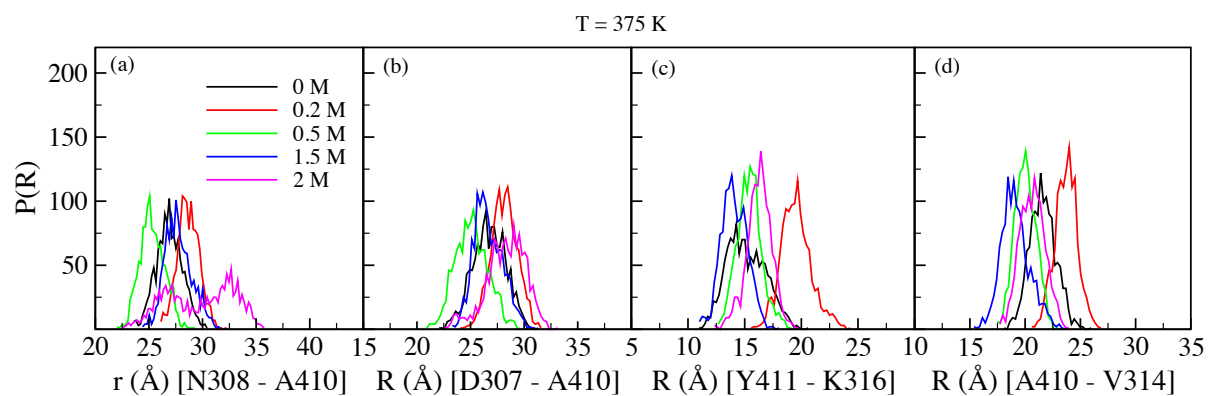

Figure S5: (a), (b), (c) and (d) show distance distribution  $[P(R)]$  for chosen pair of amino acids at 375 K

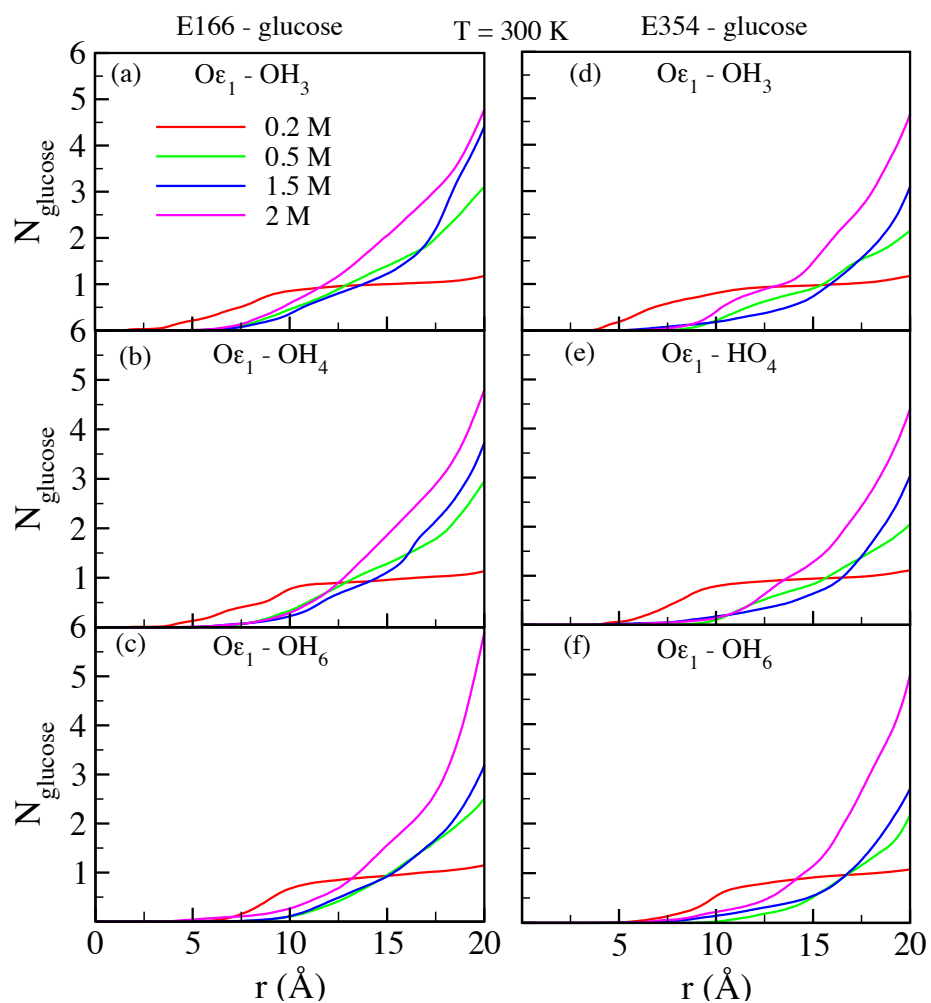

Figure S6: (a), (b) and (c) represent numbers of glucose ( $N_{\text{glucose}}$ ) as a function of the distance ( $r_d$ ) between different hydroxyl groups of glucose ( $OH_3$ ,  $OH_4$ ,  $OH_6$ ) and the  $O_{\epsilon_1}$  of E166 at 300 K. (d-f) represents represent numbers of glucose ( $N_{\text{glucose}}$ ) as a function  $r_d$  between the same hydroxyl groups as above and the  $O_{\epsilon_1}$  of E354 at 300 K.

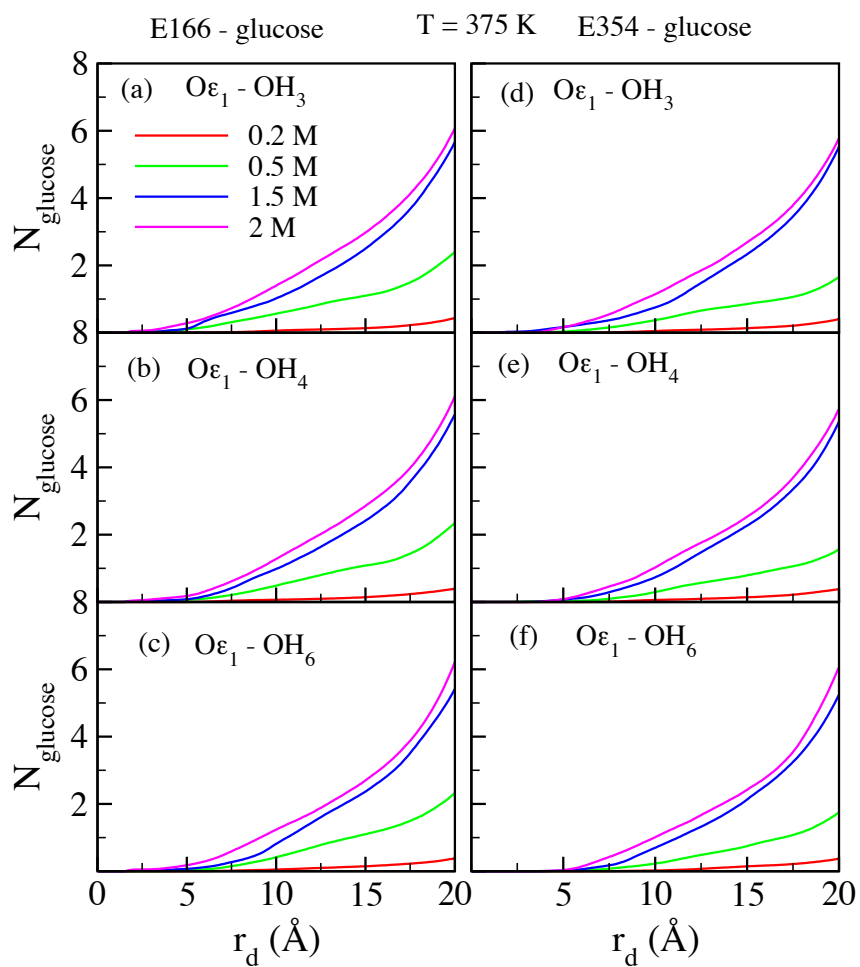

Figure S7: (a), (b) and (c) represent numbers of glucose ( $N_{\text{glucose}}$ ) as a function of the distance ( $r_d$ ) between different hydroxyl groups of glucose ( $OH_3$ ,  $OH_4$ ,  $OH_6$ ) and the  $O\epsilon_1$  of E166 at 375 K. (d-f) represents represent numbers of glucose ( $N_{\text{glucose}}$ ) as a function  $r_d$  between the same hydroxyl groups as above and the  $O\epsilon_1$  of E354 at 375 K.
